# Supplementary material for: Retrospective analysis of liraglutide and basal insulin combination therapy in Japanese type 2 diabetes patients: The association between remaining β‐cell function and the achievement of the glycated hemoglobin target 1 year after initiation
Source: PubMed Central journal article supplement — J Diabetes Investig. 2017 Dec 13;9(4):822–30. doi: 10.1111/jdi.12773 (PMC6031501; doi:10.1111/jdi.12773), 2017-12-13
Supplement: JDI-9-822-s001.pdf [file JDI-9-822-s001.pdf]

# Figure S1

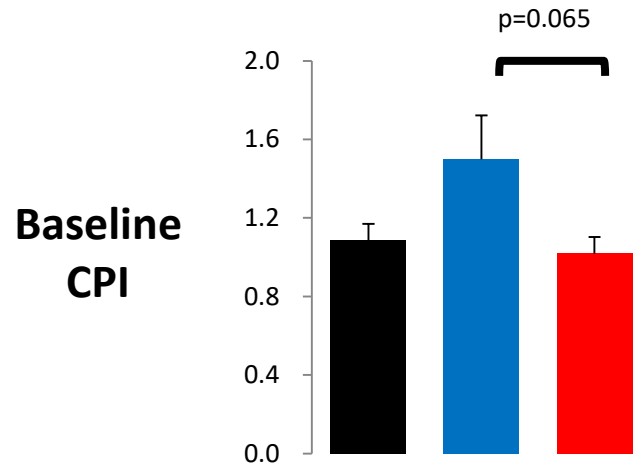

**Figure S1.** Comparison of C-peptide index (CPI) between patients with HbA1c <7% and those with HbA1c ≥7% at 54 weeks in 49 patients, including 12 who were originally excluded due to receiving additional OADs or bolus insulin. Black bar, all subjects (n=49); Blue bar, patients with HbA1c <7% at 54 weeks (n=7); and Red bar, patients with HbA1c ≥7% at 54 weeks or those receiving additional OADs or bolus insulin during the 54 weeks (n=42). Each value represents the mean ± SEM. A P-value was calculated by the Mann-Whitney U-test.
